# Supplementary material for: Chemical Profile, Antioxidant Capacity, and Antimicrobial Activity of Essential Oils Extracted from Three Different Varieties (Moldoveanca 4, Vis Magic 10, and Alba 7) of Lavandula angustifolia
Source: MDPI journal article supplement (doi:10.3390/molecules26144381), 2021-07-20
Supplement: s1 [file s1]

## Supplementary Information

Chemical profile, antioxidant capacity and antimicrobial activity of essential oils extracted from three different varieties (Moldoveanca 4, Vis Magic and Alba 7) of *Lavandula angustifolia*

Mihaela Bogdan<sup>1</sup>, Simona Bungau<sup>1,2\*</sup>, Delia Mirela Tit<sup>1,2</sup>, Dana Carmen Zaha<sup>3,4</sup>, Aurelia Cristina Nechifor<sup>5</sup>, Tapan Behl<sup>6</sup>, Dorina Chambre<sup>7,8</sup>, Andreea Ioana Lupitu<sup>8</sup>, Lucian Copolovici<sup>7,8</sup> and Dana Maria Copolovici<sup>7,8</sup>

The calibration curves calculated for Trolox used in ABTS and DPPH assays, respectively are presented in Figures S1 and S2.

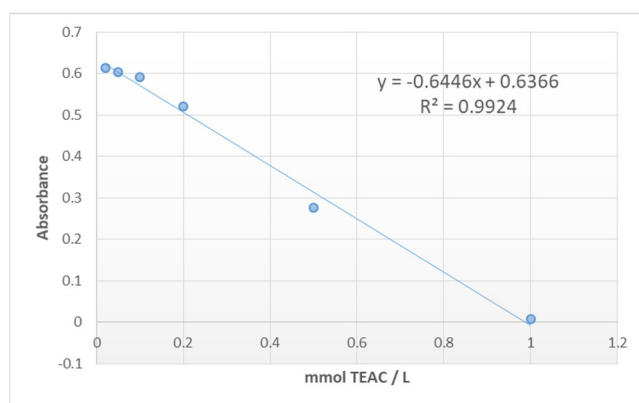

**Figure S1.** Calibration curve for ABTS assay performed with Trolox solutions with different concentrations (0.025 mM-1.0 mM).

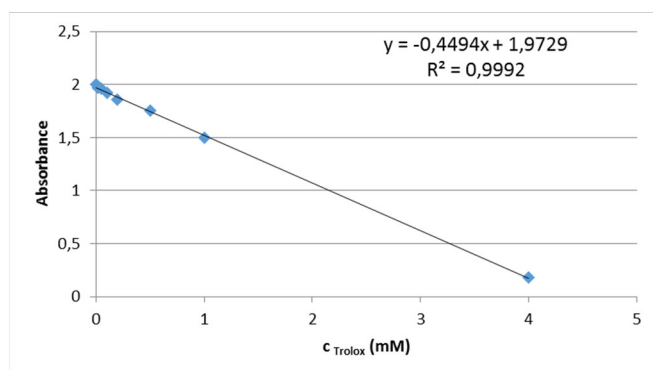

**Figure S2.** Calibration curve for DPPH assay performed with Trolox solutions with different concentrations (0.02 mM-4.0 mM).
